# Supplementary material
Source: PubMed Central journal article supplement (PMC2528074)
Supplement: M700155-MCP200_1.pdf [file M700155-MCP200_1.pdf]

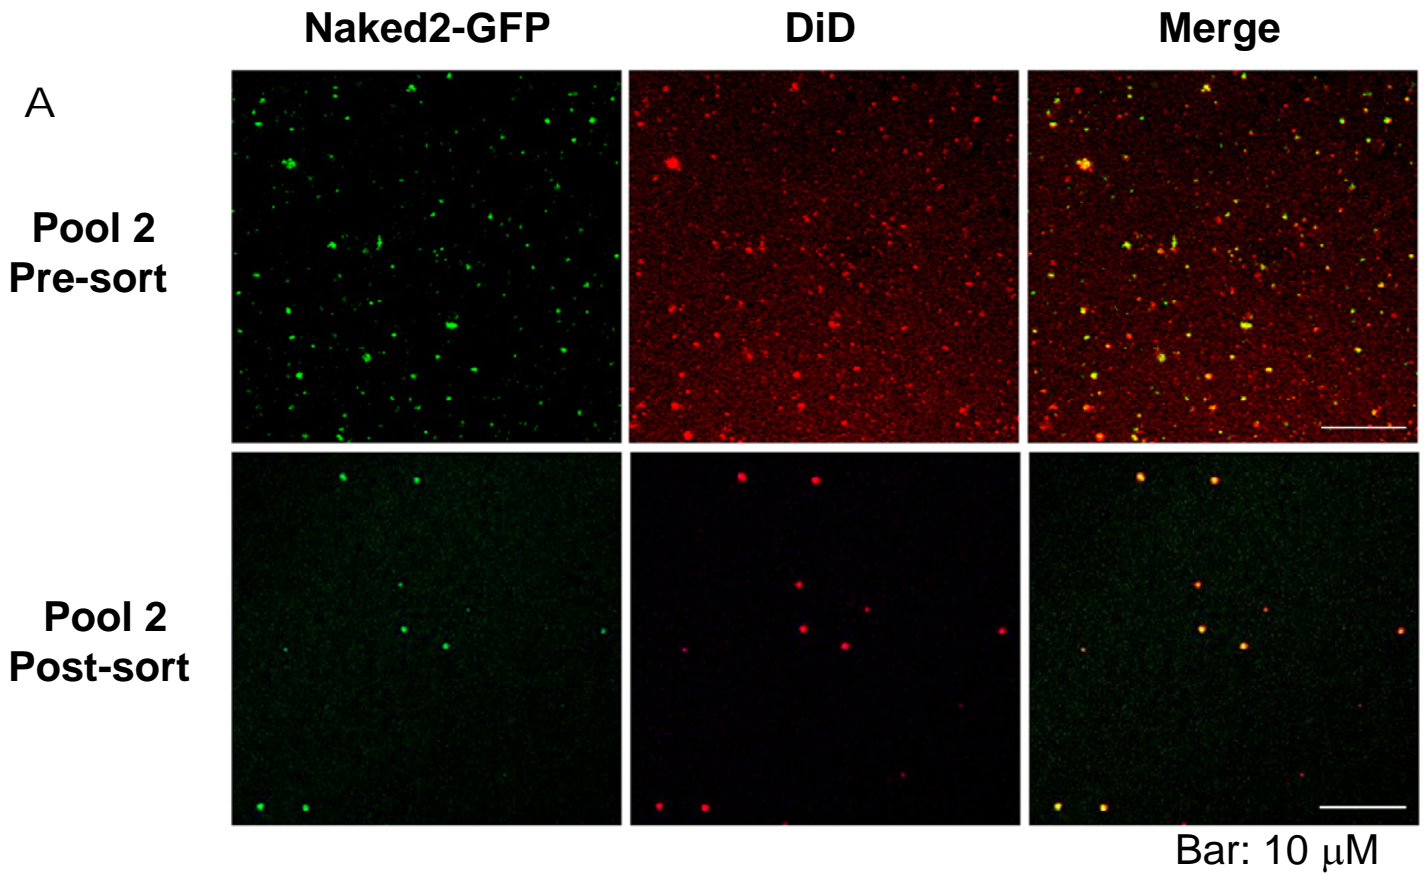

**B**

|  | G2A<br>Lysates | Pool 2   |           |
|--|----------------|----------|-----------|
|  |                | Pre-sort | Post-sort |

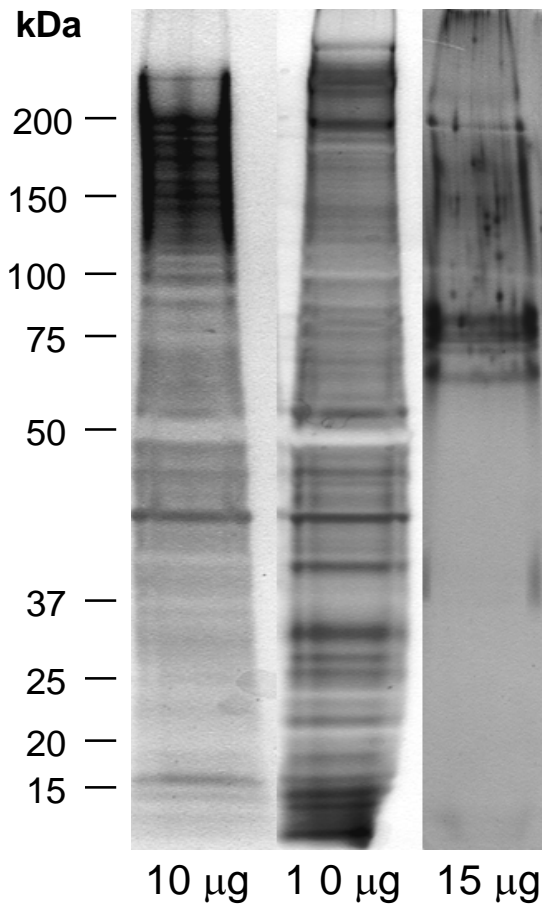

**Silver staining**—Silver staining of proteins separated by NuPAGE 4-12 % Bis-Tris gel from MDCK cells stably expressing G2A Naked2-EGFP. Whole cell lysates (10  $\mu$ g), pre-sort Pool 2 (10  $\mu$ g) and post-sort Pool 2 (15  $\mu$ g) were loaded in each lane. Note enrichment of bands in different regions of the gel in post-sort compared to pre-sort. Protein concentrations were determined using Micro BCATM Protein Assay Kit (Pierce).
